# Supplementary material for: UBAC1/KPC2 Regulates TLR3 Signaling in Human Keratinocytes through Functional Interaction with the CARD14/CARMA2sh-TANK Complex
Source: MDPI journal article supplement (doi:10.3390/ijms21249365), 2020-12-09
Supplement: s1 [file s1]

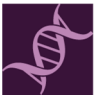

Supplementary. Material.

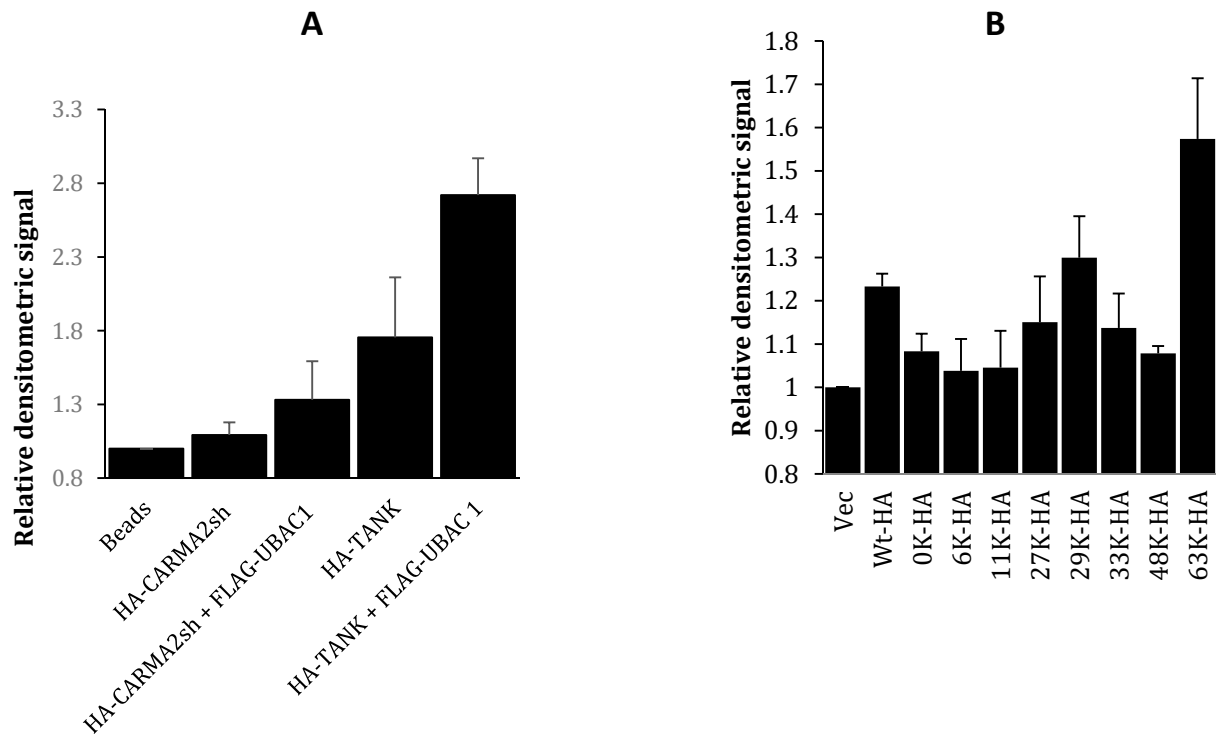

Figure S1. Densitometric analysis of the blots shown in A and B. Signals from two independent experiments were acquired and analyzed with Imagej software.
